# Supplementary material for: Facile synthesis of novel albumin-functionalized flower-like MoS2 nanoparticles for in vitro chemo-photothermal synergistic therapy
Source: Royal Society of Chemistry journal article supplement (doi:10.1039/c5ra27822h), 2016-01-01
Supplement: c5ra27822h1.pdf [file c5ra27822h1.pdf]

## Electronic Supporting Information

### **Facile synthesis of novel albumin-functionalized flower-like MoS<sub>2</sub> nanoparticles for in vitro chemo-photothermal synergistic therapy**

Liang Chen<sup>a</sup>, Wei Feng<sup>a</sup>, Xiaojun Zhou<sup>b</sup>, Kexin Qiu<sup>b</sup>, Yingke Miao<sup>a</sup>, Qianqian Zhang<sup>a</sup>, Ming Qin<sup>a</sup>, Lei Li<sup>\*c</sup>, Yanzhong Zhang<sup>a</sup> and Chuanglong He<sup>\*a,b</sup>

<sup>a</sup>College of Chemistry, Chemical Engineering and Biotechnology, Donghua University, Shanghai 201620, China

<sup>b</sup>State Key Laboratory for Modification of Chemical Fibers and Polymer Materials, Donghua University, Shanghai 201620, China.

<sup>c</sup>Department of Gastroenterology, Shanghai Tianyou Hospital, Tongji University, Shanghai 201620, China.

\*Corresponding author.

Professor Chuanglong He

College of Chemistry, Chemical Engineering and Biotechnology, Donghua University, 2999 North Renmin Road, Shanghai 201620, China.

Tel. /fax: +86 021 6779 2742

Email address: hcl@dhu.edu.cn (C.L He)

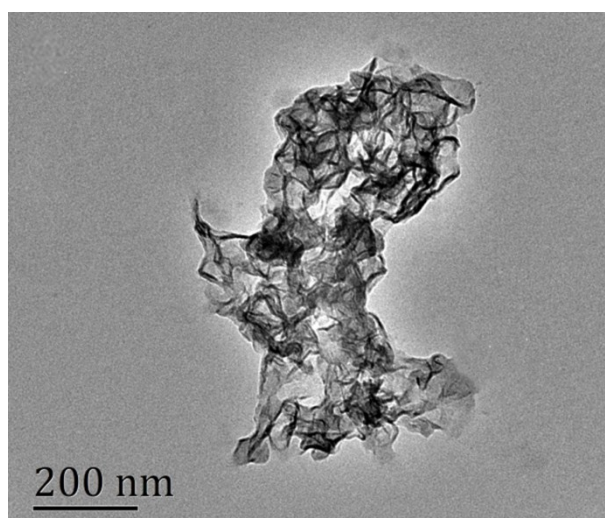

**Fig S1.** The TEM image of MoS<sub>2</sub> nanosheets prepared without hydrazine hydrate.

| Group                   | Free DOX | Chemotherapy | Photothermal | Photothermal-chemotherapy | T <sub>additive</sub> |
|-------------------------|----------|--------------|--------------|---------------------------|-----------------------|
| Therapeutic efficacy(%) | 43.86    | 24.08        | 73.36        | 87.92                     | 79.48                 |

**Table S1.** The therapeutic efficacy of different treatments. The calculated method was derived from reference.
